# Supplementary material
Source: MDPI journal article supplement (https://www.mdpi.com/2073-4468/7/1/6)
Supplement: s1 [file s1]

## **Supplemental Material**

Table S1: Peptide Mapping Sequence List

Figure S1: ADC Purification with Protein A Magnetic Beads

Table S2: %WSD Data Table

**Table S1:** LC/MS analysis of trypsin digested ADCs revealed 44 conjugated lysines. The sequence corresponding to each conjugated lysine as well as the respective population percentage (%) and standard deviation for each site are shown below. Peptide mapping samples were digested and analyzed in triplicate.

| Conjugated Lysine |          | Sequence                          | Population Percentage $\pm$ SD (%) |                |
|-------------------|----------|-----------------------------------|------------------------------------|----------------|
|                   |          |                                   | Off-Bead                           | On-Bead        |
| Light Chain       | L39+42   | VTITCRASQDVNTAVAWYQQKPGK          | 0.6 $\pm$ 0.4                      | 0.2 $\pm$ 0.2  |
|                   | L42      | ASQDVNTAVAWYQQKPGKAPK             | 2.1 $\pm$ 0.5                      | 1.6 $\pm$ 0.2  |
|                   | L107     | VEIKR                             | 11.6 $\pm$ 0.5                     | 10.2 $\pm$ 2.0 |
|                   | L126     | TVAAPSVFIFPPSDEQLK                | 0.2 $\pm$ 0.2                      | 0.3 $\pm$ 0.2  |
|                   | L145     | EAKVQWK                           | 2.9 $\pm$ 0.4                      | 2.1 $\pm$ 0.1  |
|                   | L188     | ADYEKHK                           | 9.3 $\pm$ 0.4                      | 8.6 $\pm$ 0.8  |
| Heavy Chain       | H43      | QAPGKGLEWVAR                      | 3.2 $\pm$ 0.0                      | 3.3 $\pm$ 0.8  |
|                   | H65      | YADSVKGR                          | 12.6 $\pm$ 1.2                     | 7.7 $\pm$ 0.1  |
|                   | H76      | FTISADTSKNTAYLQMNSLR              | 0.0 $\pm$ 0.0                      | 0.2 $\pm$ 0.3  |
|                   | H136     | GPSVFPLAPSSKST                    | 0.0 $\pm$ 0.0                      | 1.3 $\pm$ 1.8  |
|                   | H136+150 | GPSVFPLAPSSKSTSGGTAALGCLVK        | 1.3 $\pm$ 1.0                      | 1.6 $\pm$ 0.3  |
|                   | H216     | VDKK                              | 2.3 $\pm$ 0.1                      | 2.2 $\pm$ 0.1  |
|                   | H252     | THTCPPCPAPELLGGPSVFLFPPKPKDTLMISR | 0.1 $\pm$ 0.1                      | 0.2 $\pm$ 0.1  |
|                   | H278     | DTLMISRTPEVTCVVVDVSHEDPEVK        | 0.3 $\pm$ 0.4                      | 0.3 $\pm$ 0.4  |
|                   | H292     | FNWYVDGVEVHNAKTKPR                | 4.9 $\pm$ 2.9                      | 2.8 $\pm$ 2.9  |
|                   | H294     | TKPR                              | 10.6 $\pm$ 7.6                     | 19.3 $\pm$ 1.3 |
|                   | H330     | VSNKALPAPIEK                      | 3.5 $\pm$ 0.3                      | 2.5 $\pm$ 0.1  |
|                   | H338     | ALPAPIEKTISK                      | 19.6 $\pm$ 2.1                     | 22.6 $\pm$ 1.6 |
|                   | H342     | TISK                              | 0.0 $\pm$ 0.0                      | 0.1 $\pm$ 0.1  |
|                   | H344     | AKGQPR                            | 4.4 $\pm$ 0.3                      | 3.0 $\pm$ 0.8  |
|                   | H396     | GFYPSDIAVEWESNGQPENNYKTPPV        | 0.2 $\pm$ 0.2                      | 0.0 $\pm$ 0.0  |
|                   |          | LDSDGSFFLYSK                      |                                    |                |
|                   | H418     | LTVDKSR                           | 10.4 $\pm$ 1.2                     | 10.0 $\pm$ 1.0 |

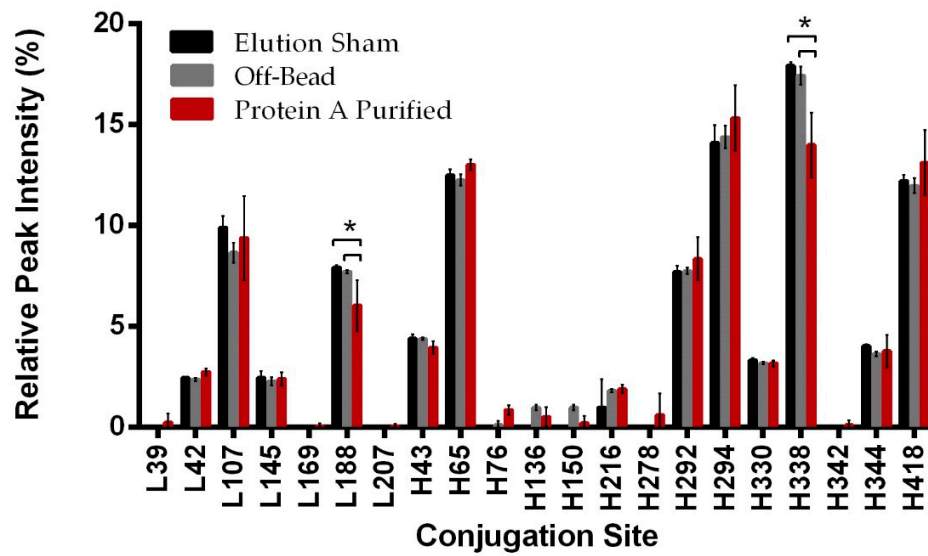

**Figure S1:** Relative peak intensity of conjugation sites as analyzed by LC/MS following tryptic digestion. All samples are T-DM1 Off-Bead ADCs from the same batch split into 3 groups. Off-Bead: No additional handling; Elution Sham: T-DM1 was exposed to elution buffer (50 mM glycine-HCl) for 5 minutes and then neutralized; Protein A Purified: T-DM1 ADCs were bound to Protein A magnetic beads to simulate a purification protocol then eluted and neutralized. Following treatment, all 3 groups underwent the peptide mapping digestion as described previously. LC/MS data of the digested peptides indicates statistically significant shifts in relative population between Protein A Purified and the other samples at 2 lysine conjugation sites as indicated by the \*.

**Table S2:** Percent weighted spectral difference (%WSD) of Off-Bead and On-Bead relative to an unmodified trastuzumab antibody. Values are reported as average percent  $\pm$  SD of triplicates.

| Wavenumber Range (cm <sup>-1</sup> ) | Off-Bead (%WSD) | On-Bead (%WSD)   |
|--------------------------------------|-----------------|------------------|
| 823 – 836.5                          | 2.75 $\pm$ 0.41 | 2.49 $\pm$ 0.57  |
| 849 – 816.5                          | 0.49 $\pm$ 0.20 | 0.35 $\pm$ 0.11  |
| 1547.5 – 1561.5                      | 1.14 $\pm$ 0.37 | 0.97 $\pm$ 0.07  |
| 1642.5 – 1670.5                      | 9.74 $\pm$ 0.32 | 11.78 $\pm$ 0.71 |
| 1671 – 1697                          | 3.89 $\pm$ 0.83 | 4.11 $\pm$ 0.89  |
